# Supplementary material
Source: Springer Nature journal article supplement (https://www.springermedizin.de/resource/supplementary/13012_2009_431_MOESM2_ESM.pdf/9629750)
Supplement: MOESM2 [file 9629750]

7 VA Primary Care CCM Practices

590 Patients Naturalistically Referred to Depression Care Manager (DCM)

386 Patients Referred by Research Protocol to Depression Care Manager

**471 were assessed by the DCM**

- 46 did not need DCM panel management per protocol
- 14 refused panel management
- 20 couldn't be reached after multiple attempts
- 3 died
- 103 dropped out (unclear why)
- 6 No data

**119 were not assessed by the DCM**

- 80 Unable to Contact
- 17 Refused
- 1 Cancelled by PCP
- 4 followed in MH Specialty Clinic
- 2 Already in Research Cohort
- 5 Too Impaired, 1 Died
- 9 No Data

**145 were not assessed by the DCM**

- 34 Unable to Contact
- 12 Refused
- 63 Followed in MH Specialty Clinic
- 1 Too Impaired
- 35 No Data

**241 were assessed by the DCM**

- 11 did not need DCM panel management per protocol (PHQ-9 <10, no prior history, not dysthymic)

285 Eligible for DCM Panel Management Per Protocol

230 Eligible for DCM Panel Management Per Protocol

**92 did not complete final 6 month DCM follow-up assessment**

- 69 declined follow-up or could not be reached
- 20 lost during DCM turnover
- 3 Died

**43 did not complete final 6 month DCM follow-up assessment**

- 38 declined or could not be reached
- 3 lost during DCM turnover
- 2 Died

193 Completed DCM 6 Month Assessment

187 Completed DCM 6 Month Assessment

380 Patients Total Completed DCM 6 Month Assessment
